# Supplementary material for: High-resolution 3D visualization of nanomedicine distribution in tumors
Source: PubMed Central journal article supplement (PMC6929971; doi:10.7150/thno.37178), 2020-01-01
Supplement: thnov10p0880s1.pdf [file thnov10p0880s1.pdf]

## Supplementary Materials

### High-resolution 3D visualization of nanomedicine distribution in tumours

Jennifer I. Moss *et al.*

**Figure S1. Representative whole tumor sections showing IHC staining for CD31 (top) and  $\alpha$ SMA (bottom).**

Suppl. Fig. 1A: Representative CD31 (top) and  $\alpha$ SMA (bottom) IHC staining on whole tumor section of Calu-6 tumor.

CD31

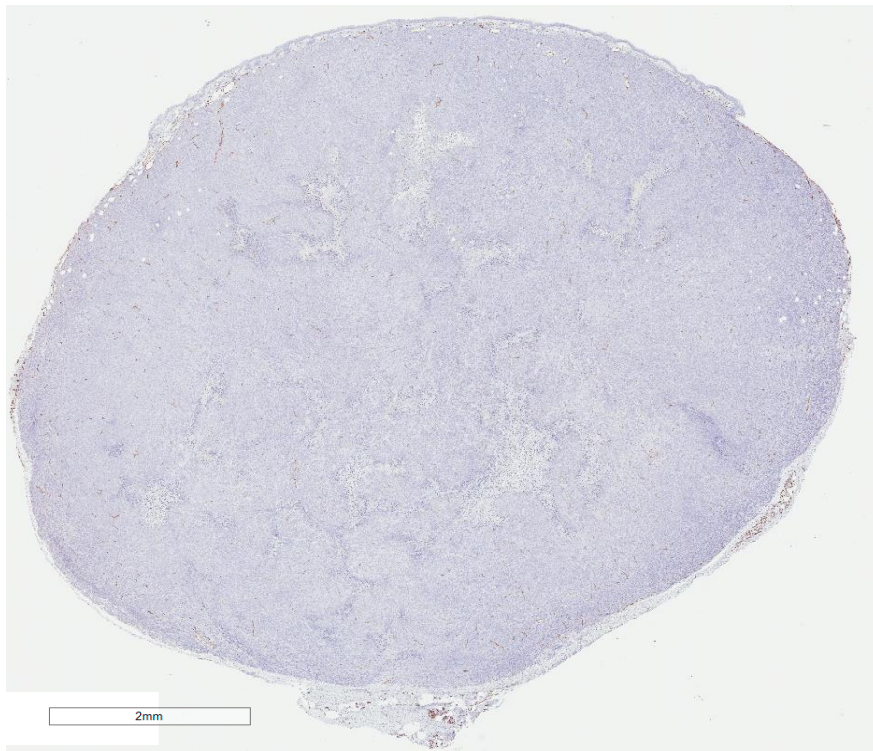

$\alpha$ SMA

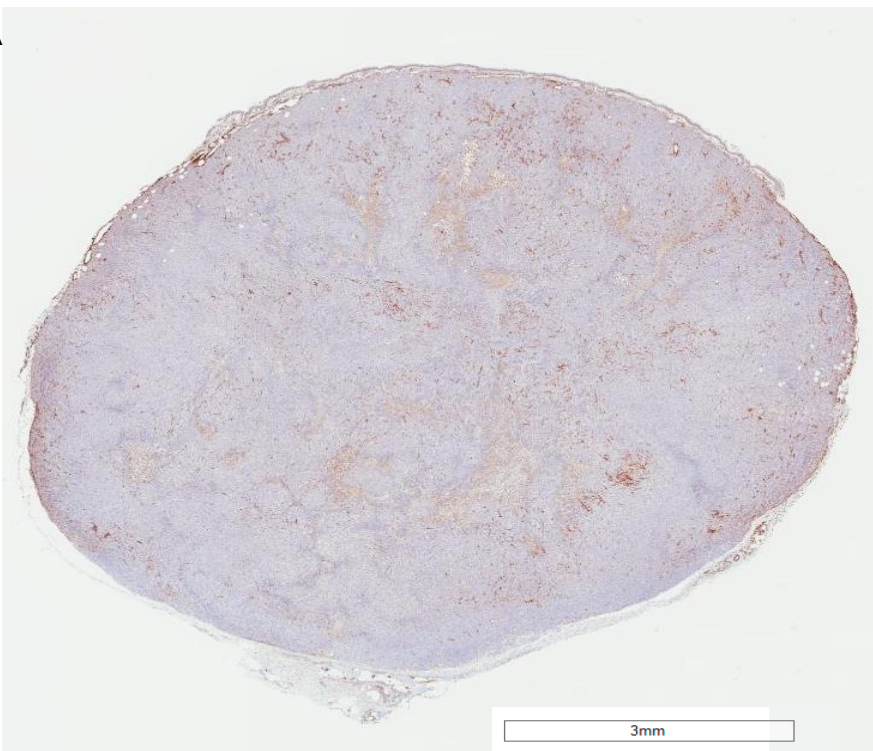

Suppl. Fig. 1B: Representative CD31 (top) and  $\alpha$ SMA (bottom) IHC staining on whole tumor section of Calu-3 tumor.

CD31

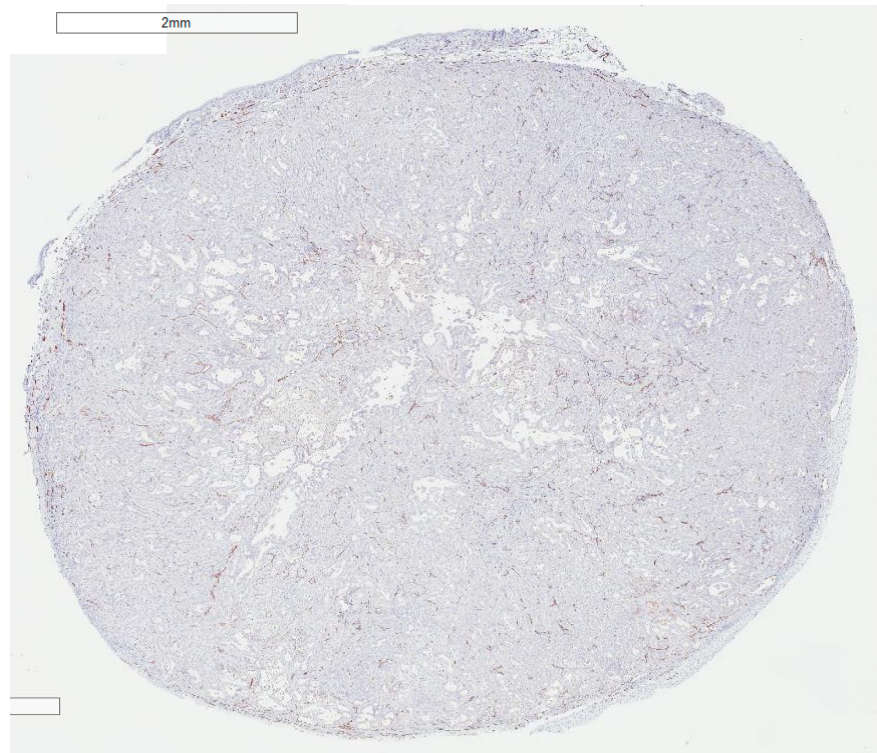

$\alpha$ SMA

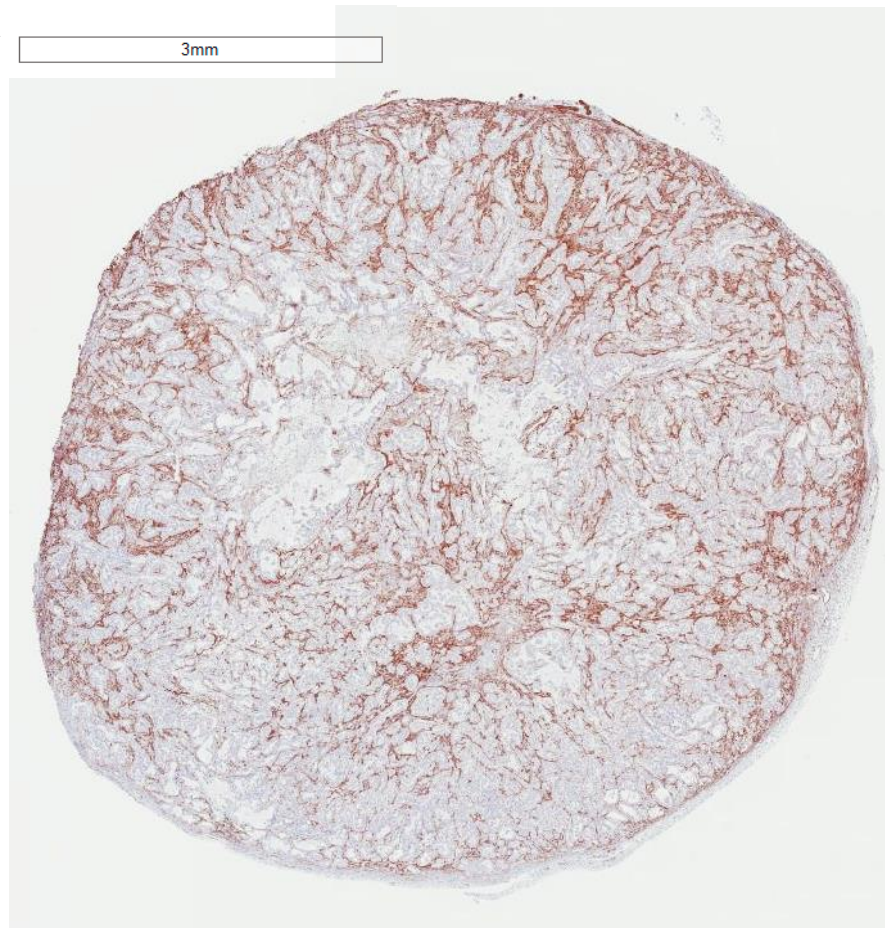



Suppl. Fig. 1C: Representative CD31 (top) and  $\alpha$ SMA (bottom) IHC staining on whole tumor section of E35CR tumor.

CD31

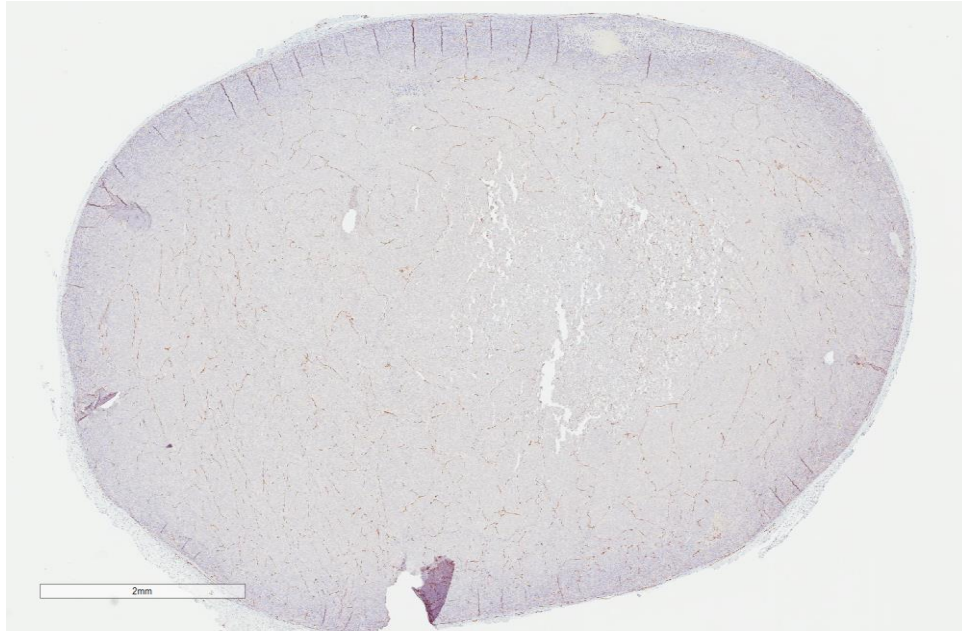

$\alpha$ SMA

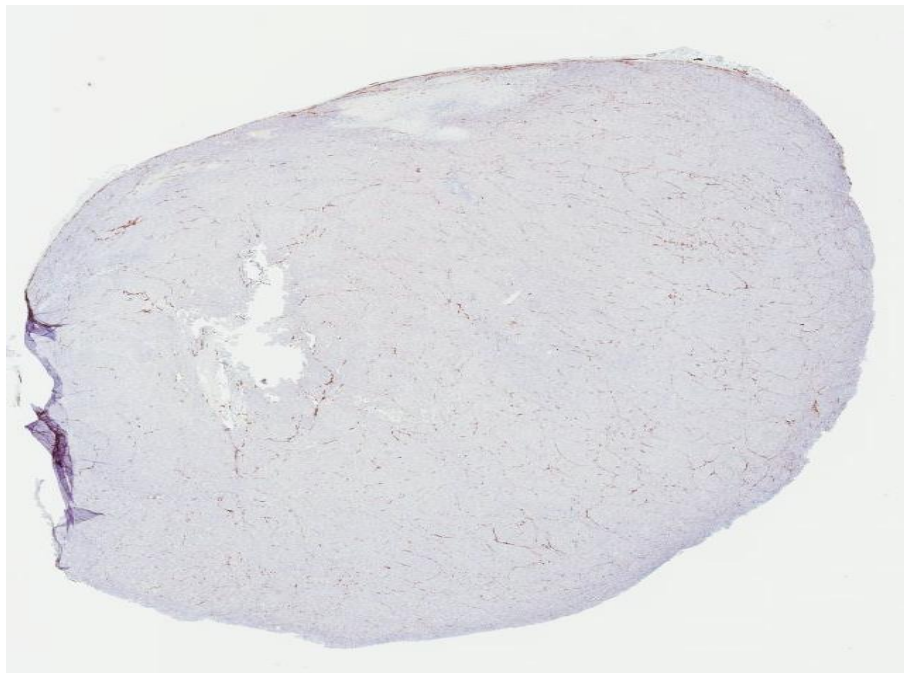

Suppl. Fig. 1D: Representative CD31 (top) and  $\alpha$ SMA (bottom) IHC staining on whole tumor section of E77 tumor.

CD31

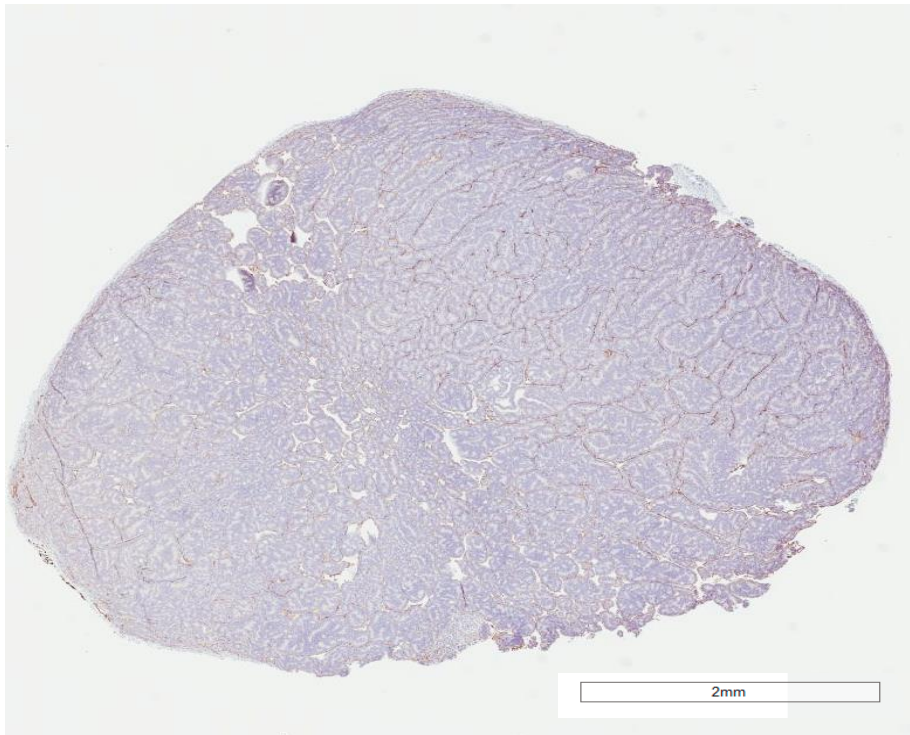

$\alpha$ SMA

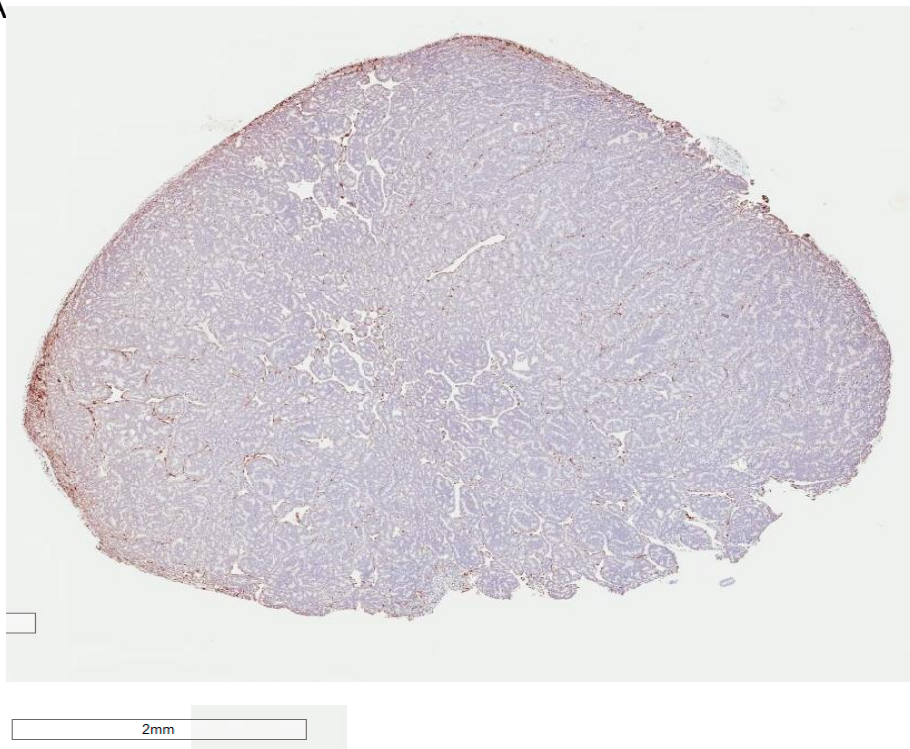

**Figure S2. Lack of  $\mu$ CT enhancement in tumor at 30 minutes post-IV (A) and post-ITu (B) administration of free iohexol.**

**Suppl. Fig. 2A: Calu-6 tumor at 30 mins post-ITu dose of free iohexol.**

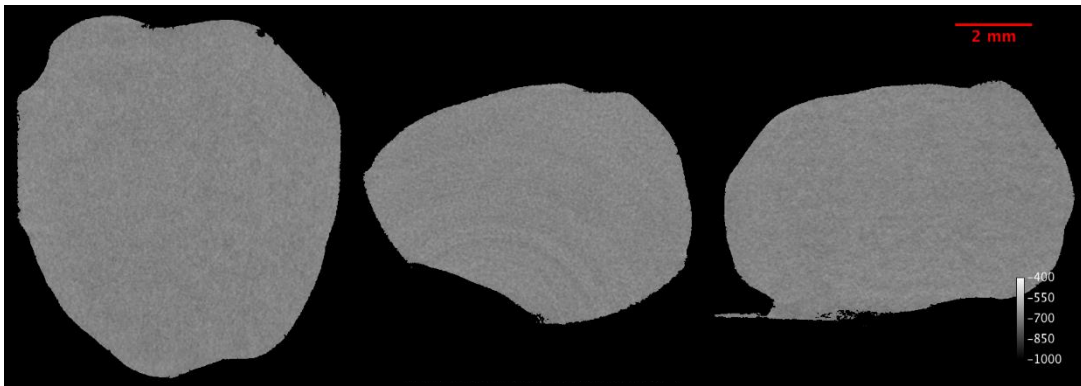

**Suppl. Fig. 2B: Calu-6 tumor at 30 mins post-IV dose of free iohexol.**

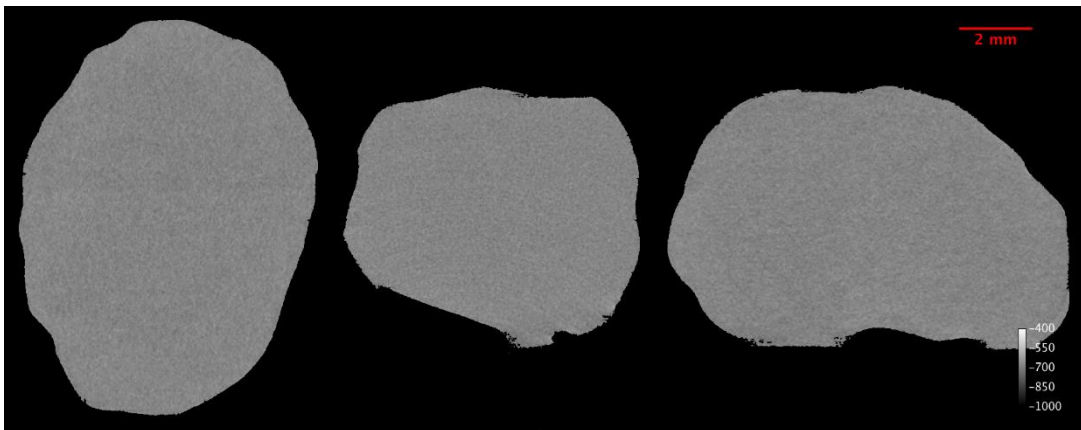

**Figure S3. Rotating 3D visualization of liposomes in H358 tumor post-ITu dosing.**

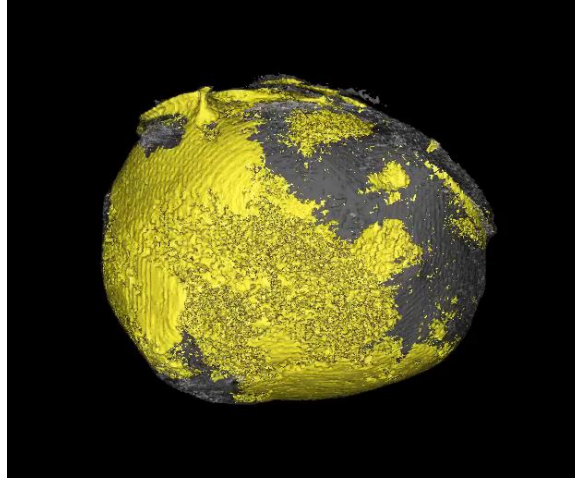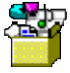

**3D Visualisation  
Rotating Tumour.mp4**
